# Supplementary figures and images for: An investigation of 1,4,7-tri(4-alkynyl)-1,4,7-triazacyclononanes: ligand synthesis and metal co-ordination chemistry †
Source: Royal Society of Chemistry journal article supplement (doi:10.1039/b007324p), 2000-01-01

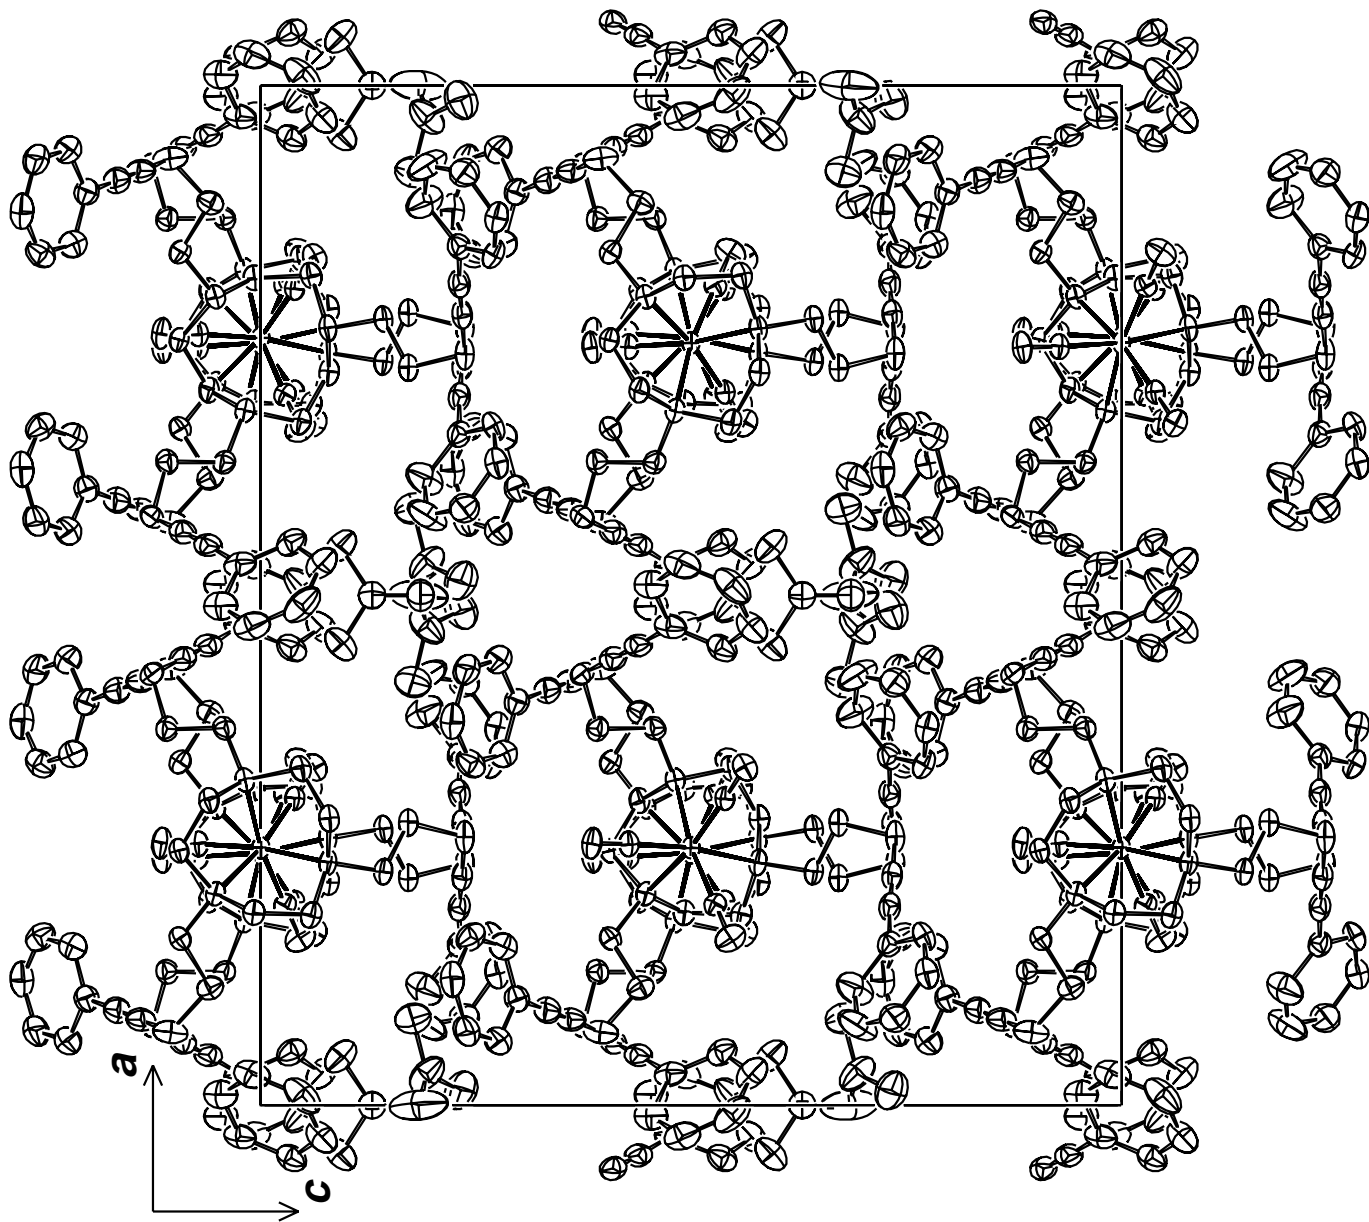

Supplement: b007324p_fig2.pdf [file b007324p_fig2.pdf]
